# Supplementary material for: Choosing sides: unusual ultrafast charge transfer pathways in an asymmetric electron-accepting cyclophane that binds an electron donor
Source: Royal Society of Chemistry journal article supplement (doi:10.1039/c8sc05514a), 2019-01-01
Supplement: c8sc05514a1.pdf [file c8sc05514a1.pdf]

## Electronic Supplementary Information

for

### Choosing Sides: Unusual Ultrafast Charge Transfer Pathways in an Asymmetric Electron-Accepting Cyclophane that Binds an Electron Donor<sup>†</sup>

Jiawang Zhou,<sup>1,2‡</sup> Yilei Wu,<sup>1,2‡</sup> Indranil Roy,<sup>1</sup> Avik Samanta,<sup>1</sup>

J. Fraser Stoddart,<sup>1,3,4</sup> Ryan M. Young,<sup>1,2\*</sup> and Michael R. Wasielewski<sup>1,2\*</sup>

<sup>1</sup>Department of Chemistry and <sup>2</sup>Institute for Sustainability and Energy,

Northwestern University, 2145 Sheridan Road, Evanston, Illinois 60208-3113

<sup>3</sup>Institute for Molecular Design and Synthesis, Tianjin University, Tianjin 300072, China

<sup>4</sup>School of Chemistry, University of New South Wales, Sydney, New South Wales 2052,

Australia

<sup>†</sup>J.Z. and Y.W. contributed equally.

#### Table of Contents

|                                                                 |            |
|-----------------------------------------------------------------|------------|
| <b>Section A. Materials / General Methods / Instrumentation</b> | <b>S2</b>  |
| <b>Section B. Synthetic Protocols</b>                           | <b>S3</b>  |
| <b>Section C. NMR Spectroscopies</b>                            | <b>S5</b>  |
| <b>Section D. Crystallographic Characterization</b>             | <b>S6</b>  |
| <b>Section E. Steady-State and Time-Resolved Spectroscopy</b>   | <b>S8</b>  |
| <b>Section F. References</b>                                    | <b>S18</b> |

## Section A. Materials / General Methods

All chemicals and reagents were purchased from commercial suppliers (Aldrich or Fisher) and used without further purification. 2,5-di(pyridin-4-yl)thiazolo[5,4-d]thiazole (TzBIPY), TTzExVBox•4PF<sub>6</sub>, Bn-TTz•2PF<sub>6</sub> and Bn-ExV•2PF<sub>6</sub> were prepared according to previous literature procedures.<sup>1, 2</sup> Thin layer chromatography (TLC) was performed on silica gel 60 F254 (E. Merck). Column chromatography was carried out on silica gel 60F (Merck 9385, 0.040–0.063 mm). High-resolution mass spectra were measured on an Agilent 6210 Time of Flight (TOF) LC-MS, using an ESI source, coupled with Agilent 1100 HPLC stack, using direct infusion (0.6 mL/min). Nuclear magnetic resonance (NMR) spectra were recorded on a Bruker Avance 600 and Varian P-Inova 500 spectrometers, with working frequencies of 500 and 600 MHz, respectively. Chemical shifts were reported in ppm relative to the signals corresponding to the residual nondeuterated solvents (CD<sub>3</sub>CN:  $\delta$  1.94 ppm).

UV/Vis absorption spectra were recorded using a UV-3600 Shimadzu spectrophotometer. Cyclic Voltammetry (CV) experiments were carried out at room temperature in Ar-purged solutions of dry CH<sub>3</sub>CN with a Gamry Multipurpose instrument (Reference 600) interfaced to a PC. All CV experiments were performed using a glassy carbon working electrode (0.071 cm<sup>2</sup>). The electrode surface was polished routinely with 0.05  $\mu$ m alumina-water slurry on a felt surface immediately before use. Platinum wire (Pt) and Ag/AgCl electrode were used as counter electrode and reference electrode, respectively. The concentration of the sample and supporting electrolyte, tetrabutylammonium hexafluorophosphate (TBAPF<sub>6</sub>), were 1.0 mM and 0.1 M, respectively. The CV cell was dried in an oven immediately before use, and Ar was continually flushed through the cell as it was cooled down to room temperature to avoid condensation of H<sub>2</sub>O.

## Section B. Synthetic Protocols

1) Bis-bromomethyl(bis-*p*-benzyl-4,4'-(thiazolo[5,4-d]thiazole-2,5-diyl))bis(hexafluorophosphate) = TTz-DB•2PF<sub>6</sub>

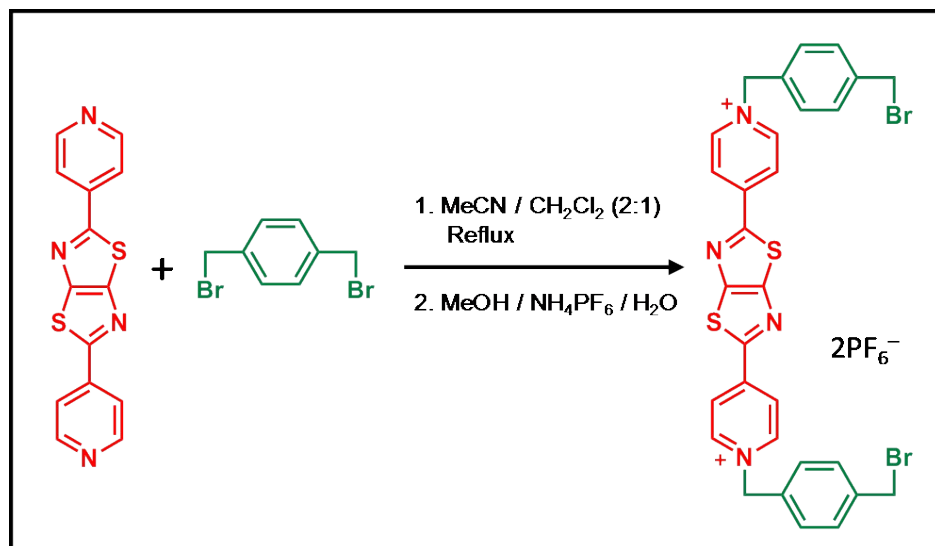

**Scheme S1.** Synthesis of TTz-DB•2PF<sub>6</sub> (5•2PF<sub>6</sub>)

The synthetic protocol was adapted from the literature procedure.<sup>1</sup>  $\alpha,\alpha$ -Dibromo-*p*-xylene (3.69 g, 13.86 mmol) was introduced into a round-bottomed flask and dry CH<sub>2</sub>Cl<sub>2</sub> (30 mL) was added to the flask. The mixture was heated under reflux at 50 °C to obtain a clear solution. Once all the compounds had dissolved the temperature was raised to 90 °C. TzBIPY (409 mg, 1.38 mmol) was dissolved in dry CH<sub>3</sub>CN (60 mL) and added to the reaction mixture over 1 h (4-5 portions). The yellow precipitate started forming after 30 min. The reaction mixture was stirred for 2 days at 90 °C, then it was brought to the room temperature and the yellow precipitate was filtered off and washed with CH<sub>2</sub>Cl<sub>2</sub> to remove the unreacted starting materials. Finally, the solid was dissolved in H<sub>2</sub>O and an excess of NH<sub>4</sub>PF<sub>6</sub> was added to precipitate the crude product. Excess NH<sub>4</sub>PF<sub>6</sub> was removed by washing several times with H<sub>2</sub>O to obtain the pure whitish yellow product in ca. 80% yield. <sup>1</sup>H NMR (500 MHz, CD<sub>3</sub>CN, 25 °C):  $\delta$  = 8.84 (AA' of AA'XX',  $J$  = 6.5

Hz, 4H), 8.54 (XX' of AA'XX',  $J = 6.5$  Hz, 4H), 7.55 (AA' of AA'BB',  $J = 7.8$  Hz, 4H), 7.47 (BB' of AA'BB',  $J = 7.8$  Hz, 4H), 5.75 (s, 4H), 4.61 (s, 4H).  $^{13}\text{C}$  NMR (125 MHz,  $\text{CD}_3\text{CN}$ , 25 °C):  $\delta = 166.0, 158.5, 157.1, 146.6, 141.2, 133.8, 131.2, 130.6, 125.8, 64.9, 33.5$ .

2) TTzBox•4PF<sub>6</sub>

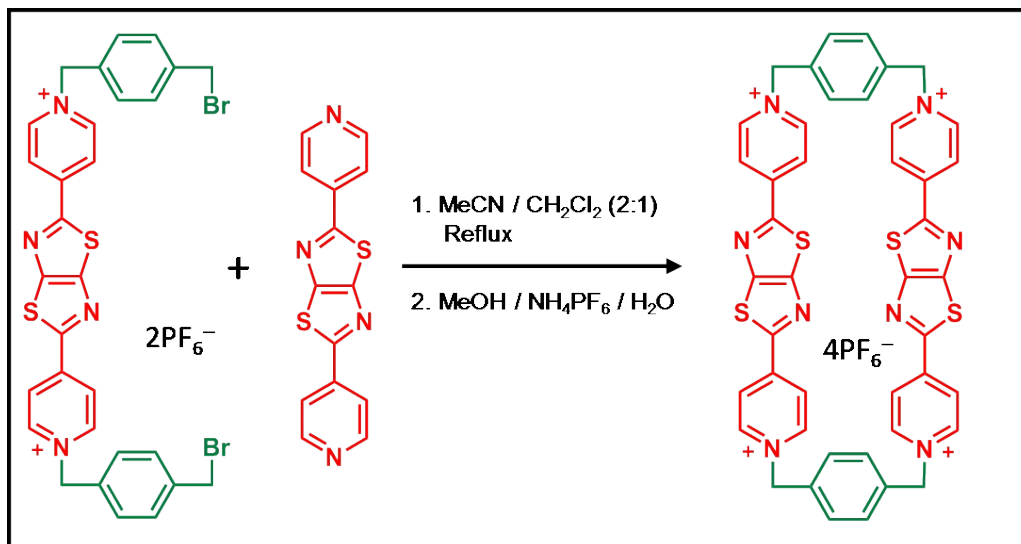

**Scheme S2.** Synthesis of 6•4PF<sub>6</sub>.

TTz-DB•2PF<sub>6</sub> (0.191 g, 0.20 mmol), TzBIPY (59 mg, 0.20 mmol) and TBAI (0.016 g) were introduced into round-bottomed flask and dry CH<sub>3</sub>CN (180 mL) was added to the flask. The mixture was stirred at 80 °C for 4 days. The reaction mixture was brought to room temperature and excess of NH<sub>4</sub>Cl was added to precipitate a yellow solid. The precipitate was filtered off and washed with Me<sub>2</sub>CO and CH<sub>2</sub>Cl<sub>2</sub> to remove the tetrabutylammonium salt. The solid was dried and then dissolved in H<sub>2</sub>O, and reprecipitated as its PF<sub>6</sub><sup>-</sup> salt by adding solid NH<sub>4</sub>PF<sub>6</sub> (~5% (w/v)). The excess NH<sub>4</sub>PF<sub>6</sub> was removed by multiple washes with H<sub>2</sub>O. Finally, pure TTzBox•4PF<sub>6</sub> was obtained after running a reverse-phase chromatography column using H<sub>2</sub>O/CH<sub>3</sub>CN (9:1 v/v) in 25% yield as a yellow solid.  $^1\text{H}$  NMR (500 MHz,  $\text{CD}_3\text{CN}$ , 25 °C)  $\delta = 8.86$

(d, 6.8 Hz, 8H), 8.36 (d, 6.8 Hz, 8H), 7.62 (d, 8 Hz, 8H), 5.72 (s, 8H).  $^{13}\text{C}$  NMR (125 MHz,  $\text{CDCl}_3$ , 25 °C)  $\delta$  = 165.7, 156.9, 148.2, 146.0, 137.0, 131.1, 125.8, 65.0.

## Section C. NMR Spectroscopies

### $^1\text{H}$ NMR Spectra in $\text{CD}_3\text{CN}$ :

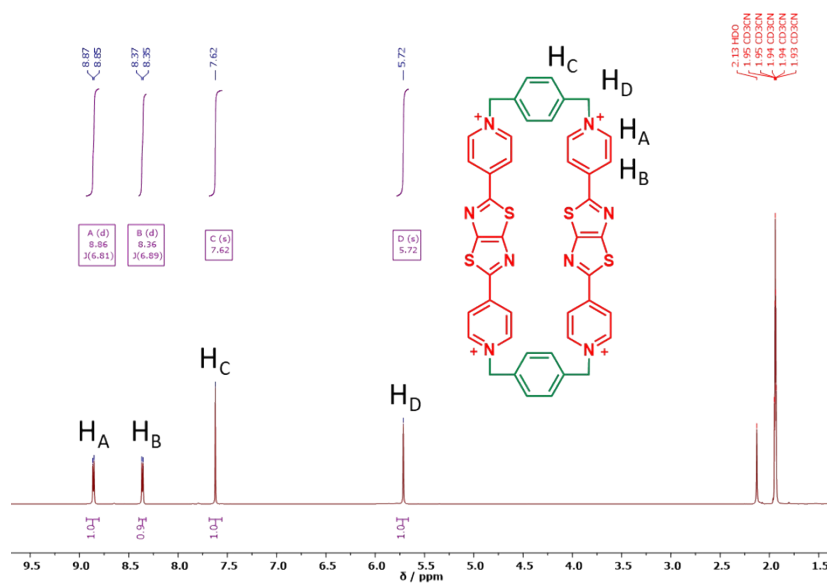

**Figure S1.** Annotated  $^1\text{H}$  NMR spectrum (500 MHz,  $\text{CD}_3\text{CN}$ , 25 °C) of TTxBBox•4PF<sub>6</sub>.

### $^{13}\text{C}$ NMR Spectra in $\text{CD}_3\text{CN}$ :

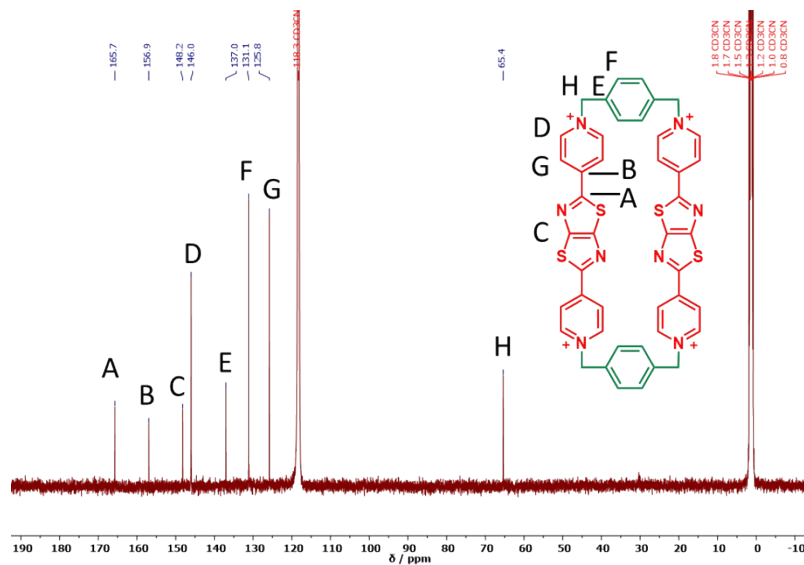

**Figure S2.** Annotated  $^{13}\text{C}$  NMR spectrum (500 MHz,  $\text{CD}_3\text{CN}$ , 25 °C) of TTzBox•4PF<sub>6</sub>.

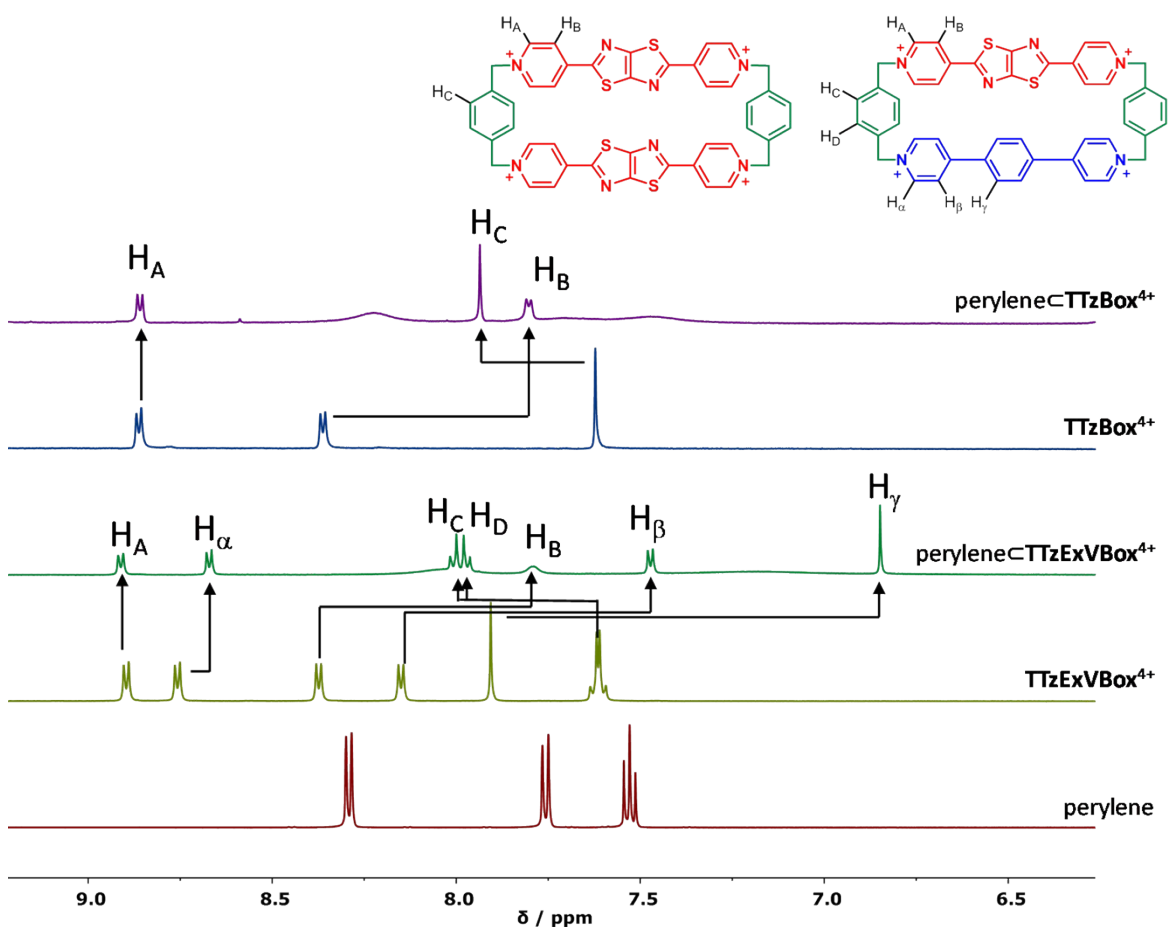

**Figure S3.** Aromatic-region insets of the  $^1\text{H}$  NMR spectra of hosts and the Per guest and its 1:1 complexes recorded in  $\text{CD}_3\text{CN}$  at 298 K on a 500 MHz instrument. Upfield shifts of the aromatic protons of  $\text{ExV}^{2+}$  and  $\text{TTz}^{2+}$  subunits as well as downfield shifts of the *p*-xylene protons are evident, indicating the binding of a Per inside  $\text{TTzExV}^{4+}$  and  $\text{TTzBox}^{4+}$  in solution.

## Section D. Crystallographic Characterization

A suitable crystal was selected and the crystal was mounted on a MITIGEN holder in Paratone oil on a Kappa Apex 2 diffractometer. The crystal was kept at 99.93 K during data collection. Using Olex2,<sup>3</sup> the structure was solved with the ShelXT<sup>4</sup> structure solution program using Direct Methods and refined with the ShelXL<sup>5</sup> refinement package using Least Squares minimization.

The crystallographic data for Per $\subset$ TTzBox•4PF<sub>6</sub> (CCDC 1872160) and for Per $\subset$ TTzExVBox•4PF<sub>6</sub> (CCDC 1872161) are available free of charge from the Cambridge Crystallographic Data Centre via [www.ccdc.cam.ac.uk/data\\_request/cif](http://www.ccdc.cam.ac.uk/data_request/cif).

### 1) Per $\subset$ TTzExVBox•4PF<sub>6</sub>

**a) Method:** Single crystals of Per $\subset$ TTzExVBox•4PF<sub>6</sub> were grown by slow vapor diffusion of <sup>1</sup>Pr<sub>2</sub>O into a solution of Per $\subset$ TTzExVBox•4PF<sub>6</sub> in CH<sub>3</sub>CN over the course of 3 days. A suitable single crystal was selected and mounted in inert oil and transferred to the cold gas stream of a Kappa Apex 2 diffractometer. The crystal was kept at 100 K during data collection. Using Olex2, the structure was solved with the ShelXT structure solution program using Direct Methods and refined with the ShelXL refinement package using Least Squares minimization.

**b) Crystal Data:** for C<sub>90</sub>H<sub>66</sub>F<sub>24</sub>N<sub>8</sub>P<sub>4</sub>S<sub>2</sub> (*M*=1903.50): triclinic, space group P-1 (no. 2), *a* = 10.448(2) Å, *b* = 10.636(2) Å, *c* = 19.123(4) Å,  $\alpha$  = 101.538(10)°,  $\beta$  = 95.067(11)°,  $\gamma$  = 104.449(10)°, *V* = 1994.8(7) Å<sup>3</sup>, *Z* = 1, *T* = 100.0 K,  $\mu$ (CuK $\alpha$ ) = 2.353 mm<sup>-1</sup>, *D*<sub>calc</sub> = 1.585 g/mm<sup>3</sup>, 16091 reflections measured (4.768 ≤ 2 $\theta$  ≤ 130.29), 6669 unique (*R*<sub>int</sub> = 0.0675, *R*<sub>sigma</sub> = 0.0599) which were used in all calculations. The final *R*<sub>1</sub> was 0.0760 (*I* > 2 $\sigma$ (*I*)) and *wR*<sub>2</sub> was 0.1943 (all data).

**c) Refinement Details:** Distance restraints were imposed on the disordered Nitrogen-Carbon and Sulfur-Carbon distances. The enhanced rigid-bond restraint (SHELX keyword RIGU) was applied globally.<sup>6</sup> There is a full molecule disorder on the Box.

### 2) Per $\subset$ TTzBox•4PF<sub>6</sub>

**a) Method:** Single crystals of Per $\subset$ TTzBox•4PF<sub>6</sub> were grown by slow vapor diffusion of <sup>1</sup>Pr<sub>2</sub>O into a solution of Per $\subset$ TTzBox•4PF<sub>6</sub> in CH<sub>3</sub>CN over the course of 3 days. A suitable single crystal was selected and mounted in inert oil and transferred to the cold gas stream of a Kappa

Apex 2 diffractometer. The crystal was kept at 100 K during data collection. Using Olex2, the structure was solved with the ShelXT structure solution program using Direct Methods and refined with the ShelXL refinement package using Least Squares minimization.

**b) Crystal Data** for  $C_{88}H_{62}F_{24}N_{10}P_4S_4$  ( $M=1967.59$ ): triclinic, space group P-1 (no. 2),  $a = 10.3592(4)$  Å,  $b = 10.5764(4)$  Å,  $c = 19.6578(8)$  Å,  $\alpha = 102.138(2)^\circ$ ,  $\beta = 95.368(2)^\circ$ ,  $\gamma = 103.900(2)^\circ$ ,  $V = 2020.28(14)$  Å<sup>3</sup>,  $Z = 1$ ,  $T = 100.01$  K,  $\mu(\text{CuK}\alpha) = 2.823$  mm<sup>-1</sup>,  $D_{\text{calc}} = 1.617$  g/mm<sup>3</sup>, 33529 reflections measured ( $8.874 \leq 2\Theta \leq 130.354$ ), 6894 unique ( $R_{\text{int}} = 0.0335$ ,  $R_{\text{sigma}} = 0.0256$ ) which were used in all calculations. The final  $R_1$  was 0.0370 ( $I > 2\sigma(I)$ ) and  $wR_2$  was 0.1019 (all data).

**c) Refinement Details:** The enhanced rigid-bond restraint (SHELX keyword RIGU) was applied on the disordered atoms.

## Section E. Steady-State and Time-Resolved Spectroscopy

All transient absorption data were background-subtracted to remove scattered light and thermally lensed fluorescence from the spectra, and then corrected for group delay dispersion (GDD, or "chirp") using Surface Xplorer Pro 4 (Ultrafast Systems, LLC). Kinetic traces were fit (singly or globally) in a laboratory-written MATLAB program.<sup>7</sup> The program solves the differential equations of the specified kinetic model, then convolutes them with a Gaussian instrument response function before employing a least-squares fitting to iteratively find the parameters which result in matches to the same functions for all selected wavelengths. Once these parameters are established, they are fed into the model solutions to yield the populations of each state in model. Finally, the total raw data matrix is deconvoluted with these populations as a function of time to produce the spectra associated with each species.



We used the following first-order kinetic models with rate matrices  $K$  for the compounds and excitation wavelengths:

For the fsTA of Per<TTzExVBox<sup>4+</sup> and Per<TTzBox<sup>4+</sup> exciting at 414 and 450 nm:

$$\underline{\underline{K}} = \begin{pmatrix} -k_A & 0 & 0 \\ 0 & -k_B & 0 \\ 0 & 0 & -k_C \end{pmatrix} \quad (\text{Eqn. S1})$$

where  $k_A$ ,  $k_B$  and  $k_C$  represent the rates of formation of the CS state, the decay of the CS state and of the perylene  $S_1$  state, respectively. A species-associated model was initially employed to fit the data, but it was not able to successfully separate the  $S_1$  spectra between the free perylene and the perylene encapsulated within the cyclophane. Therefore, a decay-associated model was used instead.

For the fsTA of Bn-TTz<sup>+•</sup> exciting at 620 nm:

$$\underline{\underline{K}} = \begin{pmatrix} -k_A & 0 \\ k_A & -k_B \end{pmatrix} \quad (\text{Eqn. S2})$$

where A and B represent the  $D_n$  and  $D_1$  states, respectively.

For the fsTA of Per<TTzExVBox<sup>3+•</sup> exciting at 620 nm:

$$\underline{\underline{K}} = \begin{pmatrix} -k_A & 0 \\ k_A & -k_B \end{pmatrix} \quad (\text{Eqn. S3})$$

where A and B represent the  $D_n$  and CS states, respectively.

For the fsTA of TTzExVBox<sup>3+•</sup> exciting at 620 nm:

$$\underline{\underline{K}} = \begin{pmatrix} -k_A - k_B & 0 & 0 \\ -k_A & -k_C & 0 \\ -k_B & 0 & -k_D \end{pmatrix} \quad (\text{Eqn. S4})$$

where  $k_A$  and  $k_B$  represent the rates for formation of the  $D_1$  and CS states from  $D_n$ , respectively. For simplicity,  $k_A$  is fixed to  $(0.8 \text{ ps})^{-1}$  based on the value from the fsTA of Bn-TTz $^{+\bullet}$ . C and D represent the  $D_1$  and CS states, respectively.

**c) Transient Absorption Spectroscopy:**

The time-resolved differential absorption spectra are reported in Figures 6, 8-10 in the main text and S8, S12-S14, while the kinetic analyses are presented in Figures S7-S14.

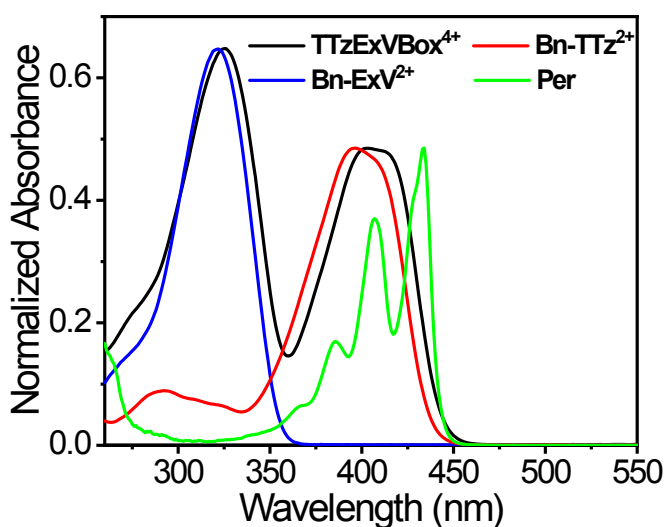

**Figure S4.** Steady-state absorption spectra of TTzExVBox<sup>4+</sup>, Bn-TTz<sup>2+</sup>, Bn-ExV<sup>2+</sup> and Per in CH<sub>3</sub>CN.

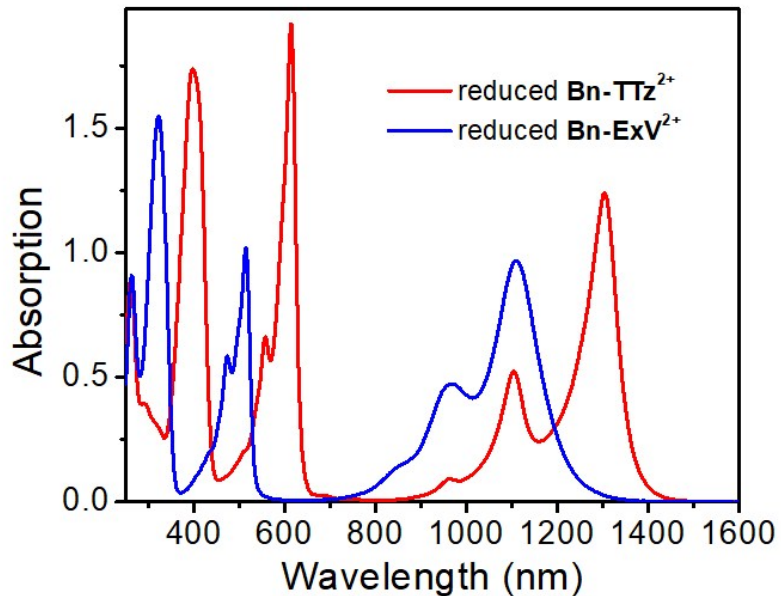

**Figure S5.** Steady-state absorption spectra of excess Bn-ExV<sup>2+</sup> and Bn-TTz<sup>2+</sup> chemically reduced by equal amount of CoCp<sub>2</sub> in CH<sub>3</sub>CN. The absorption bands at 330 and 405 nm signify the residual Bn-ExV<sup>2+</sup> and Bn-TTz<sup>2+</sup>, respectively.

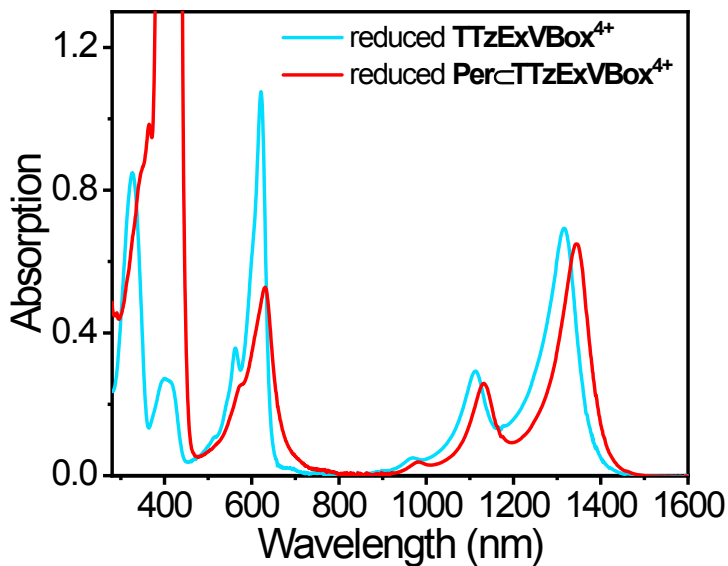

**Figure S6.** Steady-state absorption spectra of TTzExVBox<sup>4+</sup> and Per<TTzExVBox<sup>4+</sup> chemically reduced by CoCp<sub>2</sub> in CH<sub>3</sub>CN. The amount of CoCp<sub>2</sub> was less than one molar equivalent of either TTzExVBox<sup>4+</sup> or Per<TTzExVBox<sup>4+</sup>.

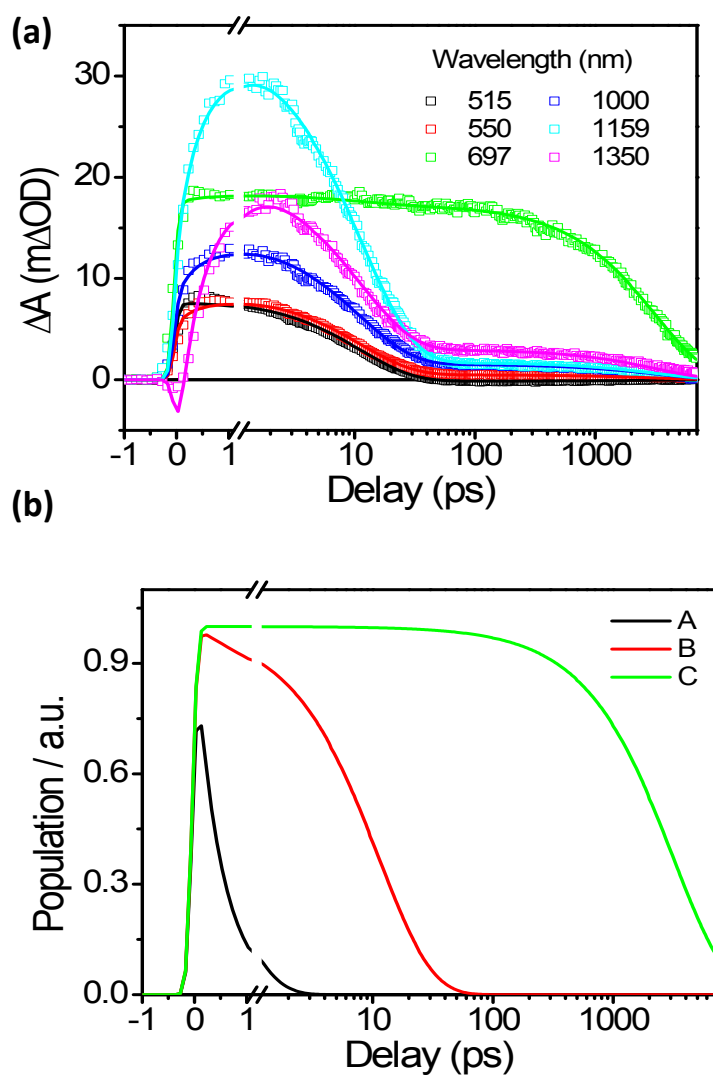

**Figure S7.** (a) Multiple-wavelength fits and (b) populations of kinetic states of PerC-TTzExVBox<sup>4+</sup> in CH<sub>3</sub>CN excited at 414 nm. (A: formation of CS state, B: decay of CS state, C: Per S<sub>1</sub>)

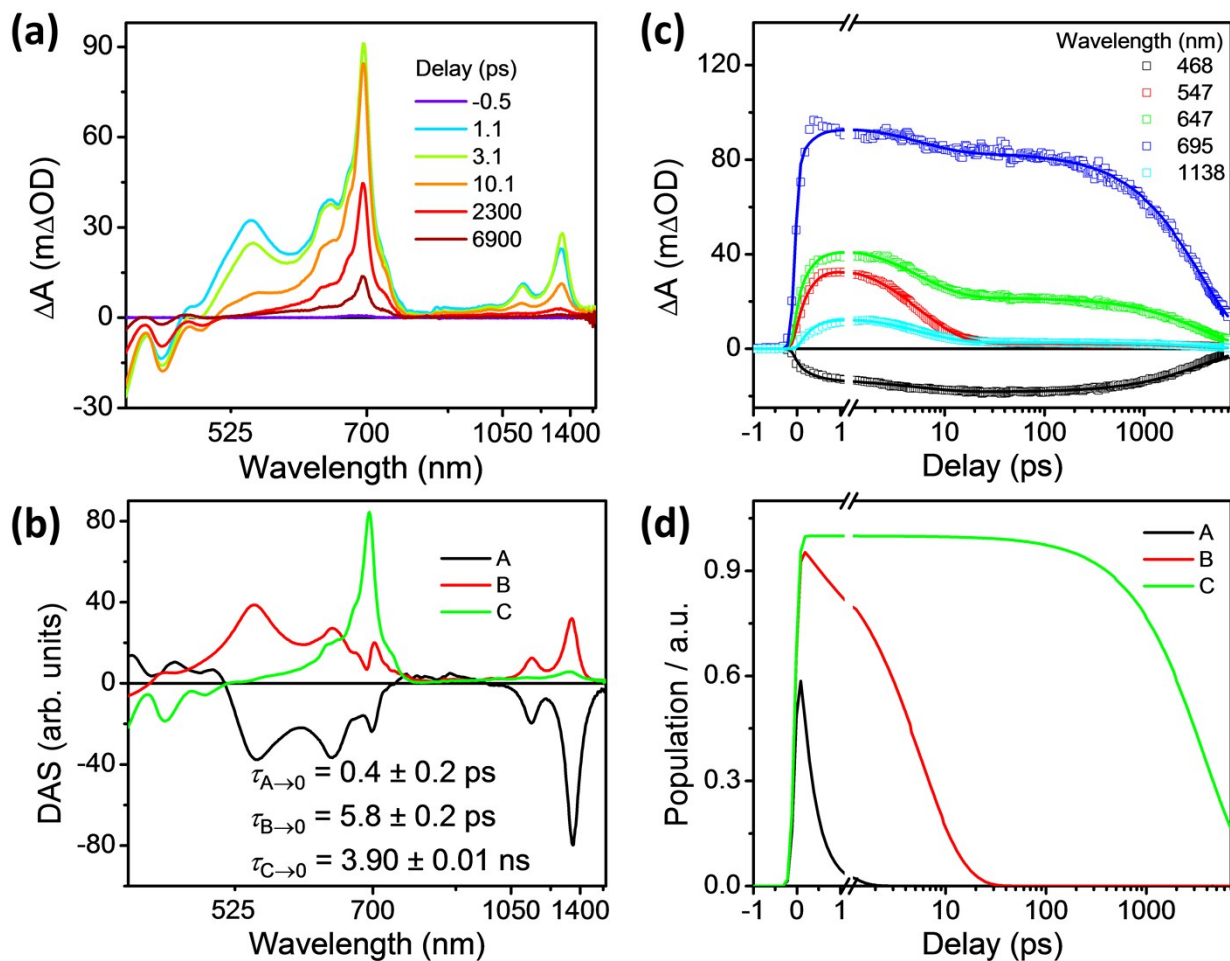

**Figure S8.** (a) fsTA spectra and (b) decay-associated spectra (DAS) and (c) Multiple-wavelength fits and (d) populations of kinetic states of Per-CTTzBox<sup>4+</sup> in CH<sub>3</sub>CN excited at 414 nm. (A: formation of CS state, B: decay of CS state, C: Per S<sub>1</sub>)

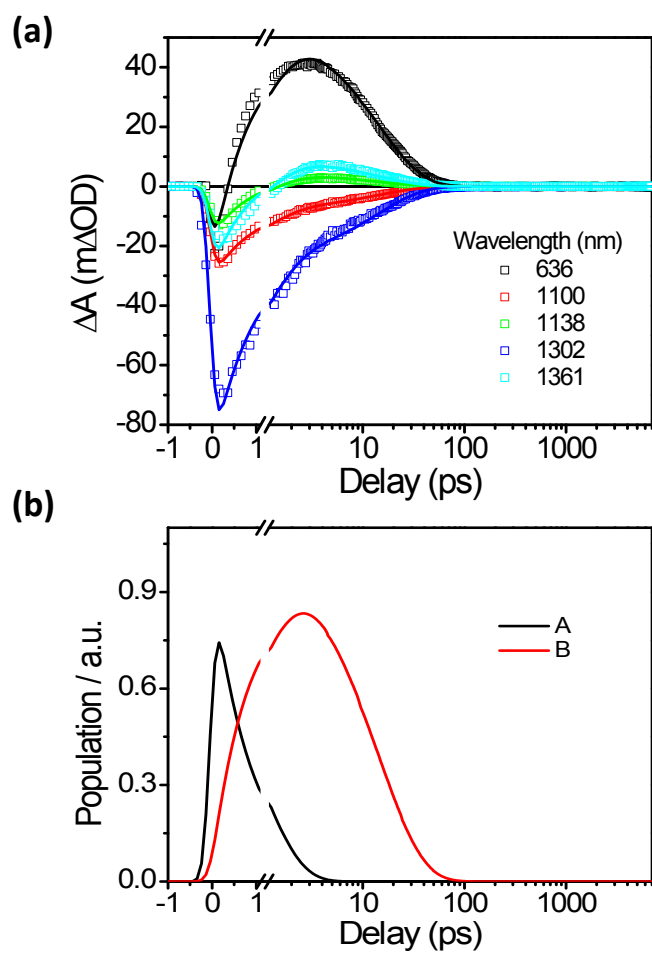

**Figure S9.** (a) Multiple-wavelength fits and (b) populations of kinetic states of Bn-TTz<sup>+</sup> in CH<sub>3</sub>CN excited at 620 nm. (A: D<sub>n</sub>, B: D<sub>1</sub>)

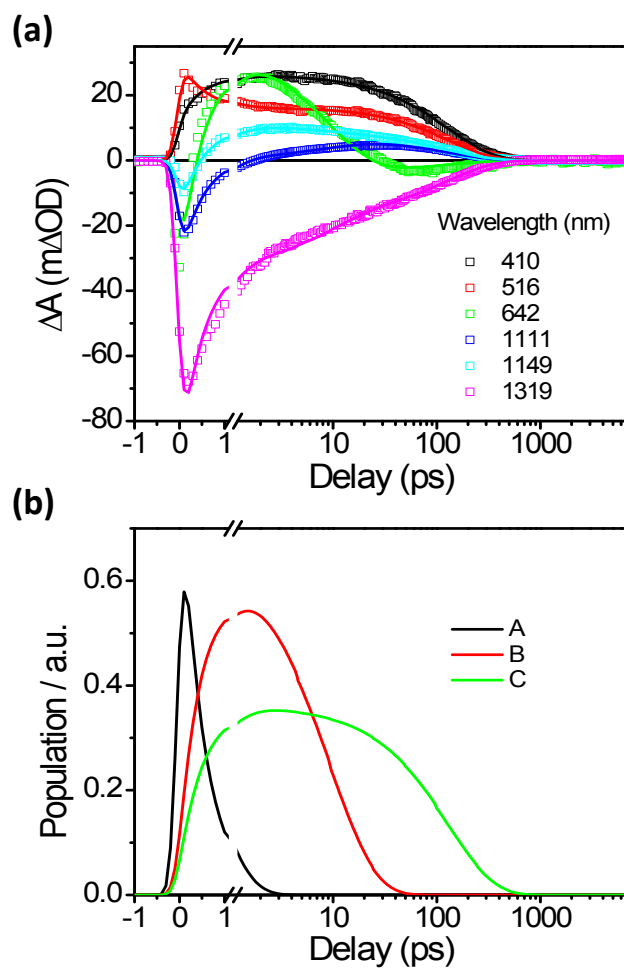

**Figure S10.** (a) Multiple-wavelength fits and (b) populations of kinetic states of TTzExVBox<sup>3+</sup> in CH<sub>3</sub>CN excited at 620 nm. (A: D<sub>n</sub>, B: D<sub>1</sub>, C: CS state)

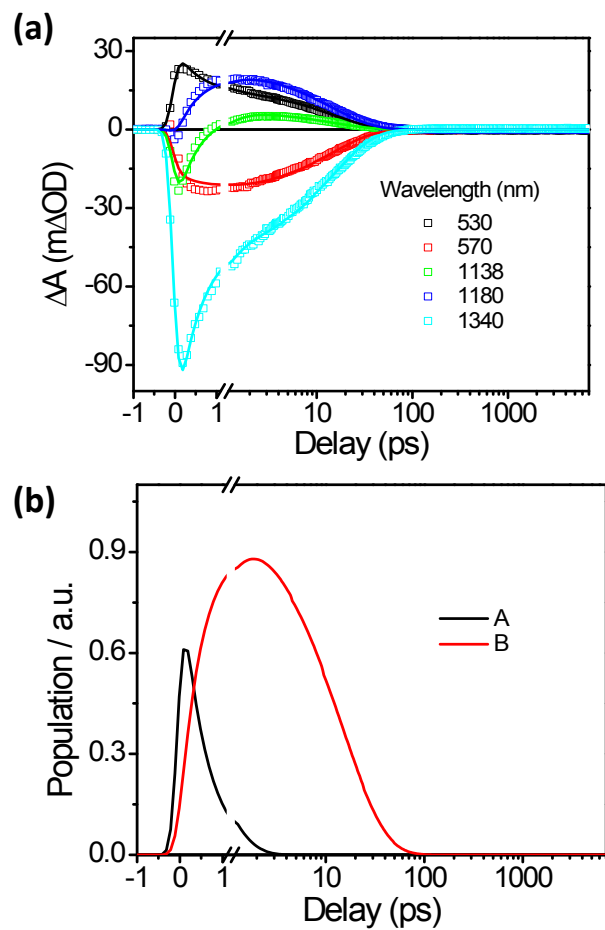

**Figure S11.** (a) Multiple-wavelength fits and (b) populations of kinetic states of Per-CTTzExVBox<sup>3+</sup> in CH<sub>3</sub>CN excited at 620 nm. (A: D<sub>n</sub>, B: CS state)



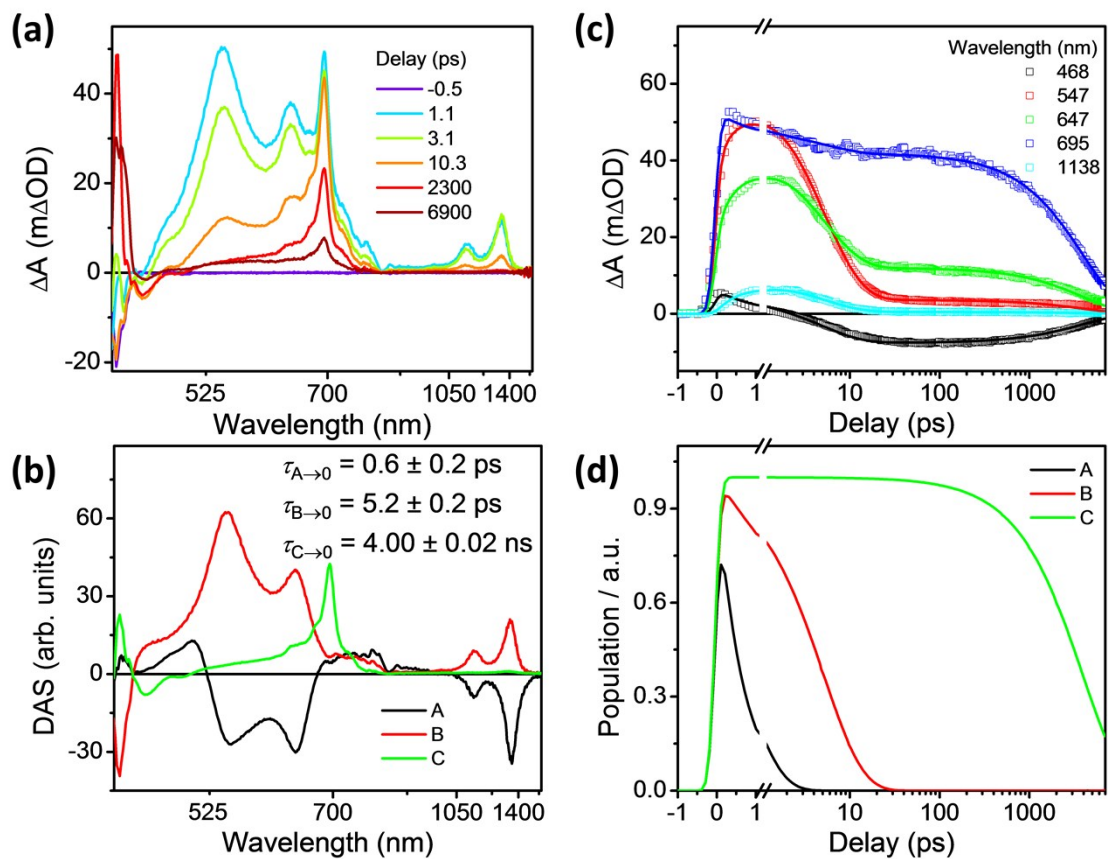

**Figure S13.** (a) fsTA spectra and (b) decay-associated spectra (DAS) and (c) Multiple-wavelength fits and (d) populations of kinetic states of PerC-TTzBox<sup>4+</sup> in CH<sub>3</sub>CN excited at 450 nm. (A: formation of CS state, B: decay of CS state, C: Per S<sub>1</sub>)

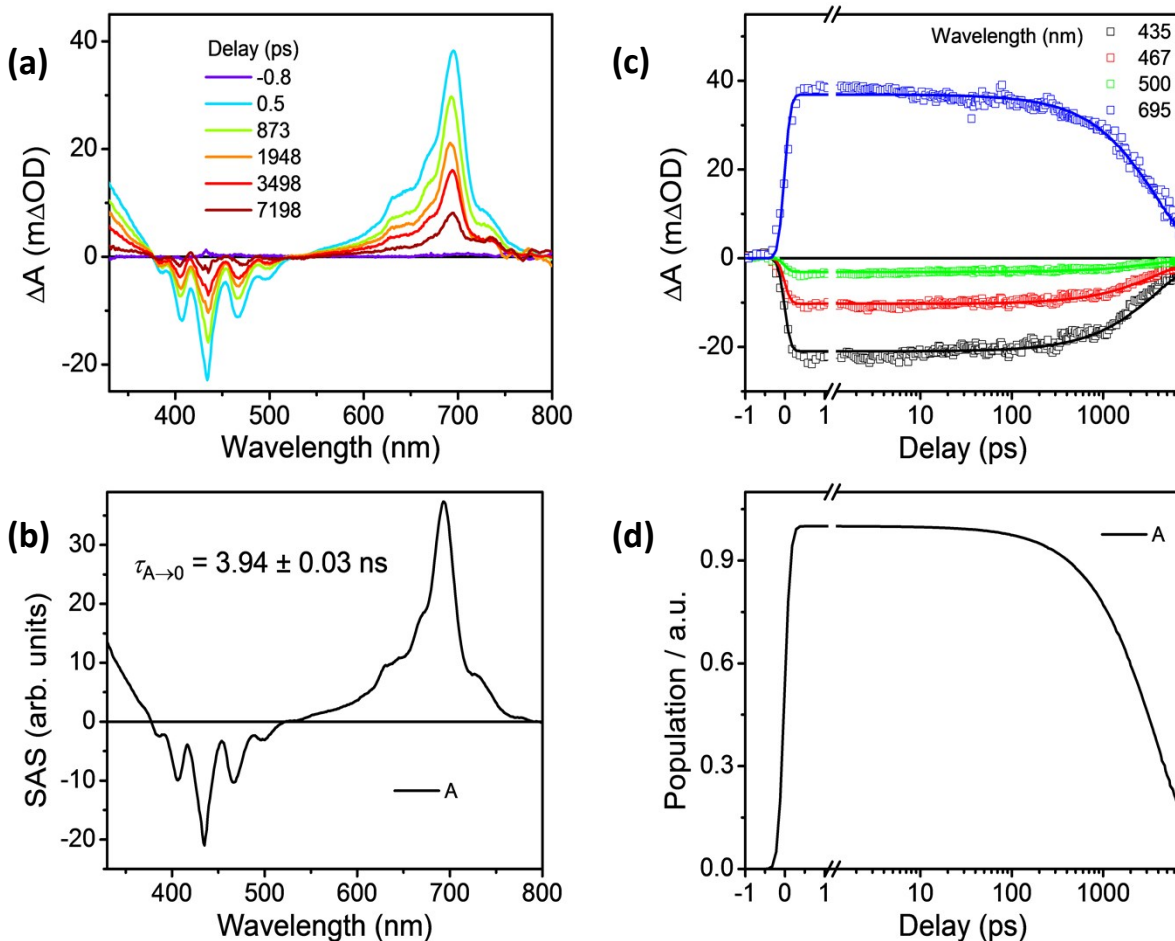

**Figure S14.** (a) fsTA spectra and (b) species-associated spectra (SAS) and (c) Multiple-wavelength fits and (d) populations of kinetic states of Per in CH<sub>3</sub>CN excited at 414 nm. (A: Per S<sub>1</sub>)

## Section F. References

1. J. C. Barnes, M. Juricek, N. L. Strutt, M. Frasconi, S. Sampath, M. A. Giesener, P. L. McGrier, C. J. Bruns, C. L. Stern, A. A. Sarjeant and J. F. Stoddart, *J. Am. Chem. Soc.*, 2013, **135**, 183-192.
2. I. Roy, S. Bobbala, J. Zhou, M. T. Nguyen, S. K. M. Nalluri, Y. Wu, D. P. Ferris, E. A. Scott, M. R. Wasielewski and J. F. Stoddart, *J. Am. Chem. Soc.*, 2018, **140**, 7206-7212.
3. O. V. Dolomanov, L. J. Bourhis, R. J. Gildea, J. A. K. Howard and H. Puschmann, *J. Appl. Crystallogr.*, 2009, **42**, 339-341.
4. G. M. Sheldrick, *Acta Crystallogr. C*, 2015, **71**, 3-8.
5. G. M. Sheldrick, *Acta Crystallogr. C*, 2015, **71**, 3-8.
6. A. Thorn, B. Dittrich and G. M. Sheldrick, *Acta Crystallogr. A*, 2012, **68**, 448-451.
7. MATLAB, 2018, The Mathworks, Inc., Natick, Massachusetts, United States.
